# Supplementary material for: Rapid Determination of Per- and Polyfluoroalkyl Substances (PFAS) in Harbour Porpoise Liver Tissue by HybridSPE®–UPLC®–MS/MS
Source: MDPI journal article supplement (doi:10.3390/toxics9080183), 2021-08-01
Supplement: s1 [file s1]

# Supplementary Materials: Rapid Determination of Per- and Polyfluoroalkyl Substances (PFAS) in Harbour Porpoise Liver Tissue by HybridSPE®-UPLC®-MS/MS

Simone Trimmel, Kristine Vike-Jonas, Susana V. Gonzalez, Tomasz Maciej Ciesielski, Ulf Lindstrøm, Bjørn Munro Jenssen and Alexandros G. Asimakopoulos

**Table S1.** SRM (Selected Reaction Monitoring) transitions, collision energies, and cone voltage values for the UPLC®-MS/MS analysis of PFAS.

| Target Analytes      | Transition 1* | Transition 2 | Collision energy (V) | Cone voltage values (V) | Ion ratio % <sup>#</sup> |
|----------------------|---------------|--------------|----------------------|-------------------------|--------------------------|
| PFBS                 | 299>80        | 299>299      | 26; 24               | 22; 8                   | 172                      |
| PFHxS                | 399>80        | 399>399      | 34; 34               | 50; 8                   | 69.8                     |
| PFOS                 | 499>99        | 499>80       | 44; 44               | 56; 36                  | 89.8                     |
| PFPeA                | 263>219       | -            | 8                    | 20                      | -                        |
| PFHxA                | 313>269       | 313>119      | 8;18                 | 10;10                   | 4.20                     |
| PFHpA                | 363>169       | 363>319      | 16;10                | 16;16                   | 35.0                     |
| PFOA                 | 413>369       | 413>169      | 8;18                 | 20;20                   | 27.1                     |
| PFNA                 | 463>419       | 463>219      | 10;16                | 20;20                   | 19.1                     |
| PFDA                 | 513>469       | 513>269      | 10;18                | 16;16                   | 11.1                     |
| PFUnA                | 563>519       | 563>269      | 10;18                | 12;12                   | 12.7                     |
| PFDoA                | 613>569       | 613>169      | 12;26                | 26;26                   | 12.1                     |
| PFTTrA               | 663>619       | 663>169      | 12;24                | 28;28                   | 12.9                     |
| PFTeA                | 713>669       | 713>169      | 14;30                | 20;20                   | 13.9                     |
| PFOSA                | 498>78        | 498>478      | 28;28                | 12;12                   | 6.3                      |
| EtFOSA               | 526>169       | 526>219      | 44;44                | 26;26                   | 69.6                     |
| PFOA-C <sup>13</sup> | 421>172       | 421>223      | 16;16                | 16;16                   | -                        |
| PFOS-C <sup>13</sup> | 507>80        | 507>172      | 56;56                | 46;32                   | -                        |

\* Ion transition with higher signal intensity (used as the quantification ion).

<sup>#</sup> Calculated from the replicates ( $N = 5$ ) performed in a standard solvent solution (10 ng/mL).

**Table S2.** Retention (RT) and relative retention (RRT) times of the UPLC®-MS/MS method, and presenting the internal standard (IS) used for the quantification of every target analyte.

| Target Analytes       | RT (min) | RRT  | IS                    |
|-----------------------|----------|------|-----------------------|
| PFBS                  | 1.69     | 0.80 | PFOA- <sup>13</sup> C |
| PFHxS                 | 1.97     | 0.95 | PFOA- <sup>13</sup> C |
| PFOS                  | 2.20     | 1.00 | PFOS- <sup>13</sup> C |
| PFPeA                 | 1.63     | 0.78 | PFOA- <sup>13</sup> C |
| PFHxA                 | 1.83     | 0.88 | PFOA- <sup>13</sup> C |
| PFHpA                 | 1.98     | 0.95 | PFOA- <sup>13</sup> C |
| PFOA                  | 2.09     | 1.00 | PFOA- <sup>13</sup> C |
| PFNA                  | 2.19     | 1.00 | PFOS- <sup>13</sup> C |
| PFDA                  | 2.28     | 1.04 | PFOS- <sup>13</sup> C |
| PFUnA                 | 2.38     | 1.08 | PFOS- <sup>13</sup> C |
| PFDoA                 | 2.46     | 1.12 | PFOS- <sup>13</sup> C |
| PFTTrA                | 2.54     | 1.16 | PFOS- <sup>13</sup> C |
| PFTeA                 | 2.61     | 1.19 | PFOS- <sup>13</sup> C |
| PFOSA                 | 2.48     | 1.11 | PFOS- <sup>13</sup> C |
| EtFOSA                | 2.71     | 1.24 | PFOS- <sup>13</sup> C |
| PFOA- <sup>13</sup> C | 2.09     | -    | -                     |
| PFOS- <sup>13</sup> C | 2.19     | -    | -                     |

**Table S3.** Mean absolute and relative recoveries (%;  $N=4$ ) of the target analytes at a fortified amount of 10 ng with 0.001 % ( $w/v$ ) ammonium formate in methanol as the precipitation agent.

| Target analyte<br>[IS used for the calculation<br>of the relative recovery (%)] | Absolute recovery (%) | Relative recovery (%) |
|---------------------------------------------------------------------------------|-----------------------|-----------------------|
| PFPA<br>(PFOA- $^{13}\text{C}$ )                                                | 76.2                  | 98.7                  |
| PFHxA<br>(PFOA- $^{13}\text{C}$ )                                               | 44.4                  | 148.1                 |
| PFHpA<br>(PFOA- $^{13}\text{C}$ )                                               | 87.3                  | 113.1                 |
| PFOA<br>(PFOA- $^{13}\text{C}$ )                                                | 84.8                  | 109.9                 |
| PFNA<br>(PFOS- $^{13}\text{C}$ )                                                | 84.7                  | 121.1                 |
| PFDA<br>(PFOS- $^{13}\text{C}$ )                                                | 79.3                  | 115.9                 |
| PFUnA<br>(PFOS- $^{13}\text{C}$ )                                               | 81.0                  | 122.0                 |
| PFDoA<br>(PFOS- $^{13}\text{C}$ )                                               | 85.0                  | 113.2                 |
| PFTTrA<br>(PFOS- $^{13}\text{C}$ )                                              | 82.8                  | 112.0                 |
| PFTeA<br>(PFOS- $^{13}\text{C}$ )                                               | 89.4                  | 117.5                 |
| PFBS<br>(PFOA- $^{13}\text{C}$ )                                                | 83.6                  | 108.2                 |
| PFHxS<br>(PFOA- $^{13}\text{C}$ )                                               | 80.9                  | 104.6                 |
| PFOS<br>(PFOS- $^{13}\text{C}$ )                                                | 54.0                  | 131.2                 |
| PFOSA<br>(PFOS- $^{13}\text{C}$ )                                               | 81.1                  | 115.8                 |
| EtFOSA<br>(PFOS- $^{13}\text{C}$ )                                              | 83.0                  | 116.8                 |
